# Supplementary material for: Auxin Response Factor SlARF2 Is an Essential Component of the Regulatory Mechanism Controlling Fruit Ripening in Tomato
Source: PubMed Central journal article supplement (PMC4696797; doi:10.1371/journal.pgen.1005649), 2015-12-30
Supplement: pgen.1005649.s001.pdf [file pgen.1005649.s001.pdf]

**S1 Table List of primers used in the studies**

| Gene Name            | Primer Sequence                                   |
|----------------------|---------------------------------------------------|
| <i>SIARF2A RNAi</i>  | F 5'-aaaaagcaggcttc CTCCTCCCATGGGTTCTGTTTAC-3'    |
|                      | F 5'-caagaaagctgggtc GGCTTTCCCAATAAGCTAAAATCC-3'  |
| <i>SIARF2B RNAi</i>  | F 5'-aaaaagcaggcttc GGGGCAATCTAGTTCATCTCATG-3'    |
|                      | F 5'-caagaaagctgggtc TGTTTTGCCAGTAAGCTGAAATCAG-3' |
| <i>SIARF2AB RNAi</i> | F 5'-aaaaagcaggcttc TTCAGGCATATATTCCGGGGC-3'      |
|                      | F 5'-caagaaagctgggtc GTTTTTGTTTGAATGGCATGCC-3'    |
| <i>Sl-Actin</i>      | F 5'-TGTCCCTATTTACGAGGGTTATGC-3'                  |
|                      | R 5'-CAGTTAAATCACGACCAGCAAGAT-3'                  |
| <i>SIARF2A</i>       | F 5'-GCAAGGTCAAGAGTTATCGA-3'                      |
|                      | R 5'-CATTGGTTTCTGAGACAAGTC-3'                     |
| <i>SIARF2B</i>       | F 5'-TTTAACGAGTATCCAACCTTCC-3'                    |
|                      | R 5'-GGGTTTAGGCATAATTTCTCCA-3'                    |
| <i>E4</i>            | F 5'-GACCACTCTAAATCGCCAGG-3'                      |
|                      | R 5'-TTCCTGAGCGGTATTGCTTT-3'                      |
| <i>E8</i>            | F 5'-TGGCTCCGAATCCTCCCAGTCT-3'                    |
|                      | R 5'-GTCCGCCTCTGCCACTGAGC-3'                      |
| <i>SAUR</i>          | F 5'-AGACAACACCACTGTTCTTTC-3'                     |
|                      | R 5'-GCCTTGAGAACTTACTGTCC-3'                      |
| <i>GH3</i>           | F-5'AGCTCGTCATCACAACATACGC-3'                     |
|                      | R-5'GTTTATCGACAAGGGCGAGTTG-3'                     |
| <i>GUS-1</i>         | F 5'-TACCGTACCTCGCATTACCC-3'                      |
|                      | R 5'-GCAGCAGTTTCATCAATCACC-3'                     |
| <i>GUS-2</i>         | F 5'-ACCGATAACCATCAGCGATCTC-3'                    |
|                      | R 5'-GTACCTTCTCTGCCGTTTCC-3'                      |
| <i>ACO1</i>          | F 5'-GCCAAAGAGCCAAGATTTGA-3'                      |
|                      | R 5'-TTTTTAATTGAATTGGGATCTAAGC-3'                 |

|             |                                      |
|-------------|--------------------------------------|
| <i>ACO2</i> | F 5'-TTTATTACAAAGTGTGCGTCCCTA-3'     |
|             | R 5'-CTCATTTTTGGGTATTAATAATATGTGT-3' |
| <i>ACO3</i> | F 5'- GGAGCCTAGGTTTGAAGCAA-3'        |
|             | R 5'- AAACAAATTCCCCCTTGAAAA-3'       |
| <i>ACO4</i> | F 5'- TGATCAAATTGCAAGTGCTTAAA-3'     |
|             | R 5'- ACCACACAACAATCACACACA-3'       |
| <i>ACS1</i> | F 5'-TCGTTTCGAAGATTGGATGA-3'         |
|             | R 5'-CAACAACAACAAATCTAAGCCATT-3'     |
| <i>ACS2</i> | F 5'-TGTTAGCGTATGTATTGACAACCTGG-3'   |
|             | R 5'-TCATAACATAACTTCACTTTTGCATTC-3'  |
| <i>ACS3</i> | F 5'-CCCTTGTCCACAAATCCAGA-3'         |
|             | R 5'-ACAGAGTGCACCCTCTAACATTT-3'      |
| <i>ACS4</i> | F 5'-CTCCTCAAATGGGGAGTACG-3'         |
|             | R 5'-TTTTGTTTGCTCGCACTACG-3'         |
| <i>ACS6</i> | F 5'-CTCCTATGGTCCAAGCAAGG-3'         |
|             | R 5'-CGACATGTCCATAATTGAACG-3'        |
| <i>EIN2</i> | F 5'-GTGTGCTGAATAAGTTTAGTGGAG-3'     |
|             | R 5'-TGCTGTACAATAGAAGAATGGAGG-3'     |
| <i>EIL2</i> | F 5'-TGAAGATGATGGAAGTCTGTAAGG-3'     |
|             | R 5'-CCACTCCCTGAGATTATCCGA-3'        |
| <i>EIL3</i> | F 5'-ACAGGACTTCAAGAAACAACCA-3'       |
|             | R 5'-GTGTTGTGCTCATAGTTGATCTG-3'      |
| <i>ETR1</i> | F 5'-GGAAGAACATTGGCATTGGAAG-3'       |
|             | R 5'-CCAAGTGGATTTTGGTGTTCGT-3'       |
| <i>ETR2</i> | F 5'-TTGGAGGAATCAATGAGGGC-3'         |
|             | R 5'-TCATTACGCGCACGAACAG-3'          |
| <i>NR</i>   | F 5'-TGCTGTTCGTGTACCGCTTT-3'         |
|             | R 5'-TCATCGGGAGAACCAGAACC-3'         |
| <i>ETR4</i> | R 5'-TGGAGGAGTGAGTGTGGATGC-3'        |

|                  |                                       |
|------------------|---------------------------------------|
|                  | F 5'-ATGGCTGTCGTTCTTGGGC-3'           |
| <i>ETR5</i>      | F 5'-GTGCTCTGGGCCCTTCACTA-3'          |
|                  | R 5'-GAACTTACGCACCCTCAATGC-3'         |
| <i>ETR6</i>      | F 5'-TCAAAAAGCCGGTGATCTCG-3'          |
|                  | R 5'-GCACCCATTTGAACGGAAAA-3'          |
| <i>CTR1</i>      | F 5'-CGATTTGAACATGACAGGGAG-3'         |
|                  | R 5'-AAGGGATTGAGATGGAAGATGG-3'        |
| <i>SI-ERF.A1</i> | F 5'-ACCGGATCCTGTTAGAGTTGGA-3'        |
|                  | R 5'-CGACGCCGATGAACAATG-3'            |
| <i>SI-ERF.A2</i> | F 5'-CGGTATCATCAGCTTCGGAAA-3'         |
|                  | R 5'-TCTCAACTTCTAATTCGGCTTGCT-3'      |
| <i>SI-ERF.A3</i> | F 5'-GCGAAATGGATCAACAGTTACCA-3'       |
|                  | R 5'-ATTAGACGACTGAAGCTTGAATTCC-3'     |
| <i>SI-ERF.B1</i> | F 5'-GAATGATGACGGAATTGTAATGAAGA-3'    |
|                  | R 5'-TTCCACAATCCCAAATTGAAGA-3'        |
| <i>SI-ERF.B2</i> | F 5'-AGTTTGCAGCGGAGATTCGT-3'          |
|                  | R 5'-TGCCCTGTCATATGCCTTTG-3'          |
| <i>SI-ERF.B3</i> | F 5'-CGGAGATAAGAGATCCAAGTCGAA-3'      |
|                  | R 5'-CTTAAACGCTGCACAATCATAAGC-3'      |
| <i>SI-ERF.C1</i> | F 5'-TTCTTCGTGTCGAAAATACTAAGTTCAGT-3' |
|                  | R 5'-ACTCTAAATTCTTCAAGAAATCCAGAACA-3' |
| <i>SI-ERF.C2</i> | F 5'-ATCATTACCATGGAATGATCAACATT-3'    |
|                  | R 5'-CCGTCTATAACTTTCTTTTCGAGGTAA-3'   |
| <i>SI-ERF.C3</i> | F 5'-CAAGAAGTTTCCTCAATCTCTCATGTAT-3'  |
|                  | R 5'-CCGAGATGAATAATCCATTTGATTT-3'     |
| <i>SI-ERF.C6</i> | F 5'-GGGAAATACGCTGCGGAAA-3'           |
|                  | R 5'-TTTCGAACGTACCTAGCCATACTCT-3'     |
| <i>SI-ERF.D1</i> | F 5'-GGCAGCTGAAATAAGAGATCCATATAA-3'   |
|                  | R 5'-CTAGCAGCCCCTTCAGCAGTAT-3'        |

|                  |                                         |
|------------------|-----------------------------------------|
| <i>SI-ERF.D2</i> | F 5'-ACACAAGTAGCACCAGCACC ACTA-3'       |
|                  | R 5'-ACCCCAAAAAAAGCAAGAAAATT-3'         |
| <i>SI-ERF.D3</i> | F 5'-ATTCATTTTCGGGTTGTGCAGTA-3'         |
|                  | R 5'-CGACTATAATGATTTCTGCCGAACT-3'       |
| <i>SI-ERF.D4</i> | F 5'-GTTGCTGCTTTAACCAATGTGATTAT-3'      |
|                  | R 5'-CTTCCGGTACGCGAAACAAG-3'            |
| <i>SI-ERF.E1</i> | F 5'-GTTCTCTCAACCCCAAACG-3'             |
|                  | R 5'-TTCATCTGCTCACCACCTGTAGA-3'         |
| <i>SI-ERF.E2</i> | F 5'-ACTTCGTGAGGAAACCCTGAAC-3'          |
|                  | R 5'-GTTACTAATATAAGTCATGTTGGGCTGAA-3'   |
| <i>SI-ERF.E3</i> | F 5'-GCATTTGCGATCTGAAGTTGTT-3'          |
|                  | R 5'-CAAATGGCTTGACATCGACTTG-3'          |
| <i>SI-ERF.E4</i> | F 5'-AGGCCAAGGAAGAACAAGTACAGA-3'        |
|                  | R 5'-CCAAGCCAAACGCGTACAC-3'             |
| <i>SI-ERF.F1</i> | F 5'-ACGAGCTTTCTTCTTTTCTCTCTCTAAA-3'    |
|                  | R 5'-GAAACTCGATATCCTTCTGTAAAATCTTC-3'   |
| <i>SI-ERF.F2</i> | F 5'-TTGATACTACTGCTTACCTAGTTTTTCT-3'    |
|                  | R 5'-TATCTTCTATGGCTCCTTCTCTTCT-3'       |
| <i>SI-ERF.F3</i> | F 5'-AGTAGTAAGGTGACCCGGATGAAG-3'        |
|                  | R 5'-CACCGATCATCCACCACAGA-3'            |
| <i>SI-ERF.F4</i> | F 5'-GAGCTAATGGCTGATTTTTGTATATAAGTTC-3' |
|                  | R 5'-AAATGGTAGAAACAGCACGAGAAAG-3'       |
| <i>SI-ERF.F5</i> | F 5'-TGGAGCGAAAGCGAAA ACTAA-3'          |
|                  | R 5'-GTCTGACTCGGACTCCGATTG-3'           |
| <i>SI-ERF.G1</i> | F 5'-GAAGAAAGCGATCGATTTGAAGA-3'         |
|                  | R 5'-TTTTCCCATGGCCTCTGT-3'              |
| <i>SI-ERF.G2</i> | F 5'-CGGTGGAGATAAAAGCGAAAAC-3'          |
|                  | R 5'-CCACTTCGCAGAACCCTAGATT-3'          |
| <i>SI-ERF.H1</i> | F 5'-AGATGCAGCAAGAGCATATGATG-3'         |

|               |                                     |
|---------------|-------------------------------------|
|               | R 5'-TTGGGTTGTATGGGAAATTAGTTCT-3'   |
| <i>β-LCY1</i> | F 5'-GTCCACTTCCAGTATTACCTCAG-3'     |
|               | R 5'-TGTCCTTGCCACCATATAACC-3'       |
| <i>β-LCY2</i> | F 5'-CGGGTTATATGGTAGCAAGGA-3'       |
|               | R 5'-CAGATGCCGATAACTCATTACC-3'      |
| <i>PSY1</i>   | F 5'-GGAAAGCAAATAATAATGGACGG-3'     |
|               | R 5'-CCACATCATAGACCATCTGTTCC-3'     |
| <i>PDS</i>    | F 5'-GGTCACAAACCGATACTGCT-3'        |
|               | R 5'-AAACCAGTCTCGTACCAATCTC-3'      |
| <i>CYC-β</i>  | F 5'-TGTTATTGAGGAAGAGAAATGTGTGAT-3' |
|               | R 5'-TCCCACCAATAGCCATAACATTTT-3'    |
| <i>ZDS</i>    | F 5'-AGTGGTTTCTGTCTAAAGGTGG-3'      |
|               | R 5'-ACCGAGCACTCATGTTATCAC-3'       |
| <i>PG2a</i>   | F 5'-TCAAGGGCACAAGTGCAACAAAGG-3'    |
|               | R 5'-TGCACGTAGCCTCTGATGGTTT-3'      |
| <i>RIN</i>    | F 5'-ATGCAGCACCATCAACACAT-3'        |
|               | R 5'-CTCCAAATTCAAAGCATCCA-3'        |
| <i>NOR</i>    | F 5'-AGAGAACGATGCATGGAGGTTTGT-3'    |
|               | R 5'-ACTGGCTCAGGAAATTGGCAATGG-3'    |
| <i>FUL1</i>   | R 5'-GTTTTGCCACAACAACCTGGACTC-3'    |
|               | R 5'-CTTGCTGCTGTGAAGAACTACC-3'      |
| <i>FUL2</i>   | R 5'-AATGGAGAAGTAGAAGGATCATCG-3'    |
|               | R 5'-GATAACATAATATTGTCCGCTTGC-3'    |
| <i>CNR</i>    | F 5'-GCCAAATCAAGCAATGATGA-3'        |
|               | R 5'-TCGCAACCATACAGACCATT-3'        |
| <i>TAGL1</i>  | F 5'-ACTTTCTGTTCTTTGTGATGCT-3'      |
|               | R 5'-TTGGATGCTTCTTGCTGGTAG-3'       |
| <i>AP2a</i>   | F 5'-AACGGACCACAATCTTGAC-3'         |
|               | R 5'-CTGCTCGGAGTCTGAACC-3'          |

|             |                               |
|-------------|-------------------------------|
| <i>HB-1</i> | F 5'-CAATCGGAGGAAGATGATGG-3'  |
|             | R 5'-TGTTTCATGGTGCTGCTCTTC-3' |
