# Supplementary material for: Auxin Response Factor SlARF2 Is an Essential Component of the Regulatory Mechanism Controlling Fruit Ripening in Tomato
Source: PubMed Central journal article supplement (PMC4696797; doi:10.1371/journal.pgen.1005649), 2015-12-30

A

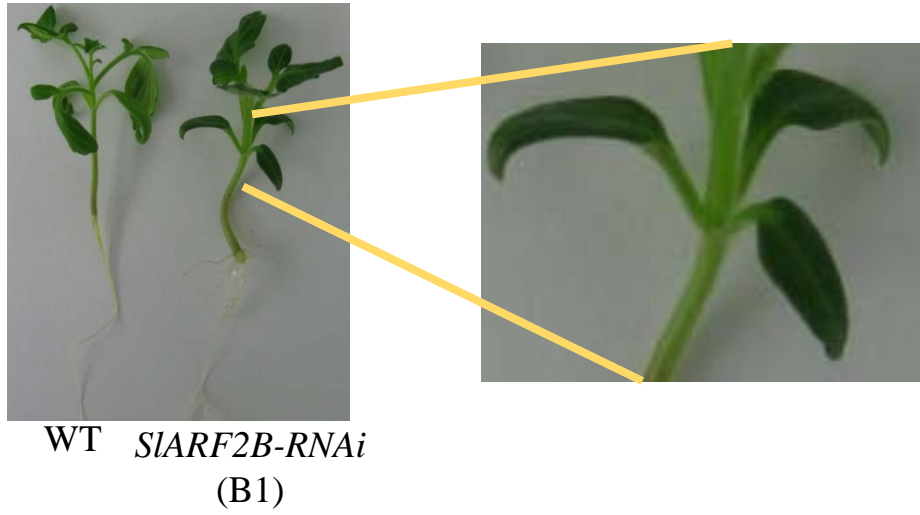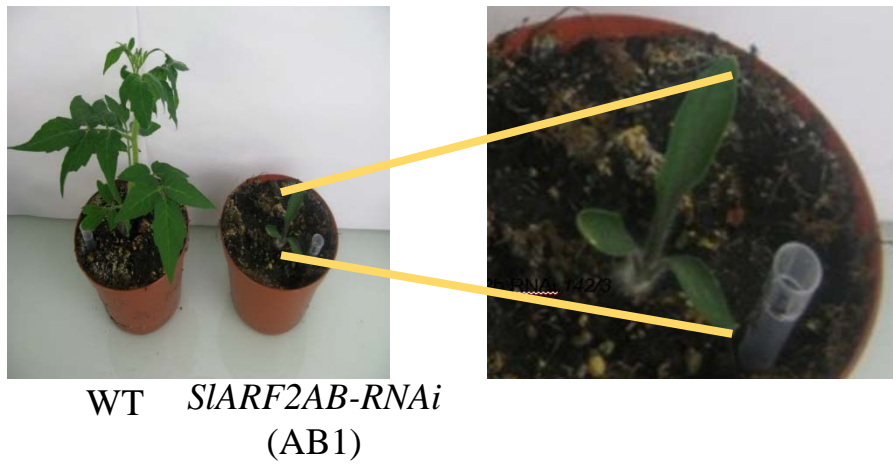

B

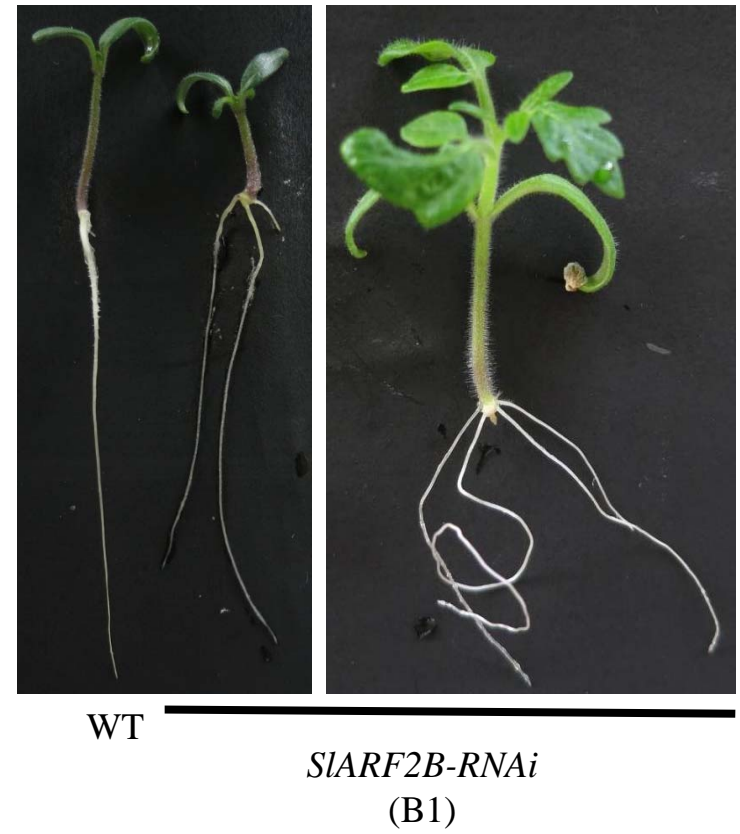

Supplement: pgen.1005649.s002.pdf [file pgen.1005649.s002.pdf]
