# Supplementary material for: Auxin Response Factor SlARF2 Is an Essential Component of the Regulatory Mechanism Controlling Fruit Ripening in Tomato
Source: PubMed Central journal article supplement (PMC4696797; doi:10.1371/journal.pgen.1005649), 2015-12-30

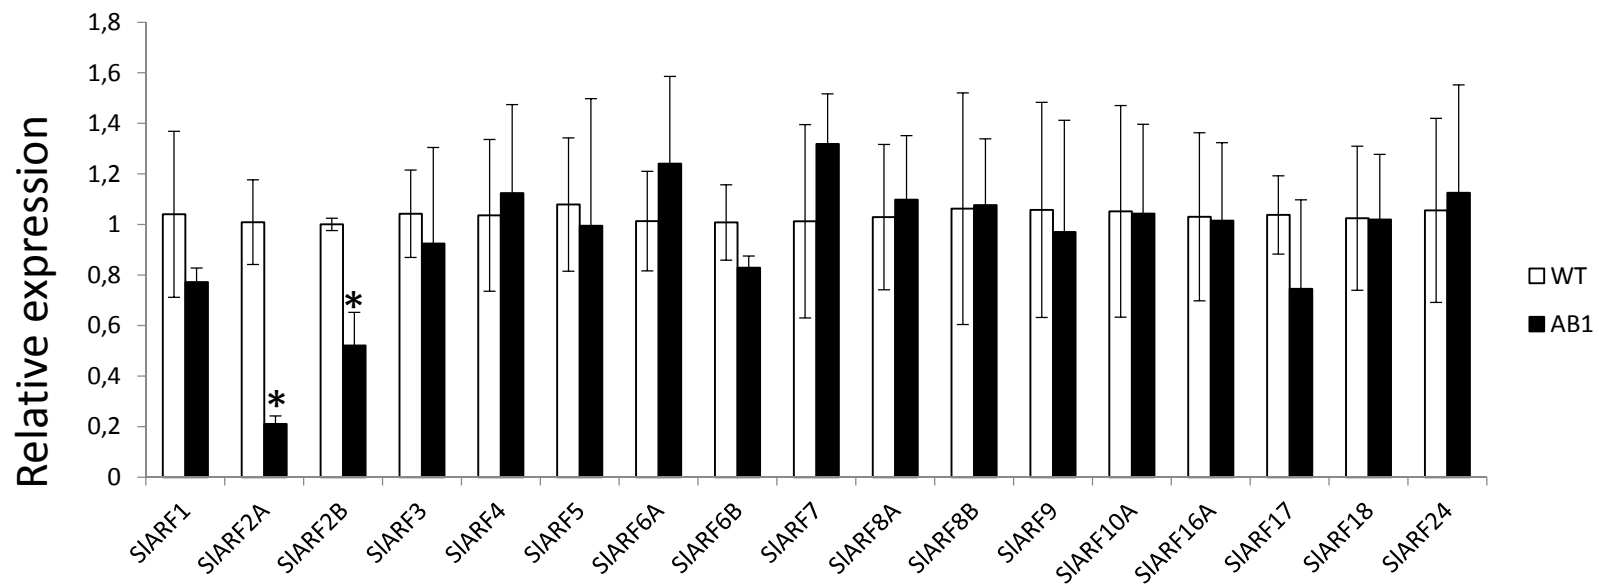

Supplement: pgen.1005649.s003.pdf [file pgen.1005649.s003.pdf]
